# Supplementary material for: Crystal Structures of the Global Regulator DasR from Streptomyces coelicolor: Implications for the Allosteric Regulation of GntR/HutC Repressors
Source: PubMed Central journal article supplement (PMC4918961; doi:10.1371/journal.pone.0157691), 2016-06-23
Supplement: pone.0157691.s004.pdf [file pone.0157691.s004.pdf]

|              |   | $\alpha_D1$                                                                                         | $\alpha_D2$ | $\alpha_D3$    | $\beta_D1$ | $\beta_D2$ |    |
|--------------|---|-----------------------------------------------------------------------------------------------------|-------------|----------------|------------|------------|----|
|              |   | hhhhhhhhhhhhhh                                                                                      | hhhhhhh     | hhhhhhhhhhhhhh | ssss       | ssss       |    |
| DasR (S.c.)  | 1 | -----MSTDVSSA-ENEGGATVRTARVPKYRLKHLDDMT--RTQTPGTPVPPERTLAAEFDTSRRTTVRQALQELVVEGRLERIQGKGFVA-KPK     |             |                |            |            | 88 |
| PhnF (M.s.)  | 1 | -----MTAGAA---PRILKHQVVRaelDRML--DGMRIgDPPFAEREIAEQFEVARETVRQALRELLIDGRVER-RGRTTVVA-RPK             |             |                |            |            | 75 |
| NagR (B.s.)  | 1 | -----MNINKQSPIPIIYQIMEQLKTQIKNGELQPDMLPSEREYAEQFGISRMTVRQALSNLVNEGLLYRLKGRGTFVS-KPK                 |             |                |            |            | 78 |
| ScuR (S.c.)  | 1 | -----MSLDLSVDRSSPVPLYFQLSQQLEAAIEHGALTPGSLGNETELAARLGLSRPTVRQAIQSLVDKGLLVRRRGVGTQVV-HSK             |             |                |            |            | 82 |
| PsuR (P.s.)  | 1 | -----MPTPPA---ASSLAAQMGESpAPLYARVKHMIALQIQNGTWPPHHRVPSESELVTQLGFSRMTINRALRELTVEGLLVRMQGVGTQVVA-EPK  |             |                |            |            | 88 |
| CguR (C.g.)  | 1 | -----MTTEAPIWPAELFEDLDRNGPIPLYFQVAQRLEDGIRSGVLPGARLENEISVAKHLNVSRTPTVRRAIQEVVDKGLLVRRRGVGTQVV-QSH   |             |                |            |            | 91 |
| BbuR (B.b.)  | 1 | MAEARPDSLTRSRAAKPA-----GEGAAFSPLYRQIKELLVQSLDRGEWKPGELIPSEIDLAAARFQVSQGTVRKAVDELAEEHLLRRQGKGFVA-THH |             |                |            |            | 94 |
| EfuR (E.f.)  | 1 | -----MVQNIPIYIQIHDKIKEDIKGVWSIGDRLPSERELALKFDVSRMTLRQAIQTLADEGILERKIGSGTYVA-RKK                     |             |                |            |            | 74 |
| YurK (B.s.)  | 1 | -----MLNNGSSTPLYIQLKQIITDDIKKGVYSPtakLPENELCTKYNVSRITVRKALDLVEEGYLIRQQGKGFVK-SPK                    |             |                |            |            | 77 |
| PhnF (E.c.)  | 1 | -----MHLSTHPTSYPTRYQEIAAKLEQELR-QHYRCGDYLPaeQQLAARFEVNRHTLRRaidQLVEKGVQRRQGVGLVL-MRP                |             |                |            |            | 79 |
| SauR (S.a.)  | 1 | -----MTFGEQPAYLRVAGDLRKKIVDGSLLPpHTRLPSQARIREEYGVSDTVALEARKVLMAEGLVEGRSGSGTYVR-ERP                  |             |                |            |            | 75 |
| EcuR (E.c.)  | 1 | -----MRAMKSLSKSSQIPLYQVVEWIRESIYTGDLVEDDRIPSEYQIMDMLEVSRGTVKKAVAQLVKEGVLIQVQGKGFVK-KEN              |             |                |            |            | 82 |
| TreR (B.s.)  | 1 | -----MKVNFITIIYKDIAQQIEGGRWKAEEILPSEHELTAQYGTSRRETVRKALHMLAQNGYIQKIRGKGSVVLNREK                     |             |                |            |            | 73 |
| StuR (St.a.) | 1 | -----MLKYEHIAKQLNAFIHQSNFKPGDKLPNVTQLKERYQVSKSTIIKALGLLEQDGLIYQAQGSQTYVR-NIA                        |             |                |            |            | 70 |
| BcuR (B.c.)  | 1 | -----MASGSTQVKYLGIIYQKMKQQILDGEYKINEKIPSSPILAEFGVSVLTIKKALDLLVRDGYIIRRRGSGTVVQ-DWR                  |             |                |            |            | 76 |
| YydK (B.s.)  | 1 | -----MLKYQQIATEIETYIEEHQLQQGDKLPVLETLMAQFEVSKSTIITKSLELLEQKGAIFQVRGSGIFVR-KHK                       |             |                |            |            | 70 |
| BauR (B.a.)  | 1 | -----MASGSTQVKYLGIIYQKMKQQILDGEYKINEKIPSSPVLAEFGVSVLTIKKALDLLVRDGYIIRRRGSGTVVQ-DWR                  |             |                |            |            | 76 |
| TraR (S.p.)  | 1 | -----MAYRAQGAGYADVAEHYRSRIKAGELAPGDALPSVTDIRQQFDVAAKTVSRALAVLKRVLVTSRGALGTVVA-KSP                   |             |                |            |            | 76 |

Residues of NagR involved in DNA binding

**S4 Fig. Sequence alignment of structurally characterized members of the GntR/HutC transcription factor family.** The sequence alignment was performed with CLUSTAL OMEGA [59] using the canonical protein sequences of the structurally characterized (full or partial) GntR/HutC family members specified in Supplemental Table S2. Secondary structure elements refer to the topology of DasR and are marked with (h) or (s) for  $\alpha$ -helices and  $\beta$ -strands, respectively. For a detailed classification, the familiar nomenclature  $\alpha_{D/E}$  and  $\beta_{D/E}$  is used. Residues involved in DNA binding in NagR [11] and effector binding in DasR or NagR are highlighted by a coloured background. Residues involved in of DNA and effector binding, e.g. those forming base-specific contacts with the DNA, or hydrogen bonds as well as hydrophobic and CH/ $\pi$  interactions with the phosphorylated sugar, are additionally marked by a black arrow.

|              | $\beta^*/\alpha^*$ | $\alpha_1$                                                                                            | $\beta_1$          | $\alpha_2$ | $\beta_2$  | $\beta_3$     | $\alpha_3$ | $\alpha_4$ |  |
|--------------|--------------------|-------------------------------------------------------------------------------------------------------|--------------------|------------|------------|---------------|------------|------------|--|
|              | ****               | hhhhhhhh                                                                                              | s-----ssssssssss-s | hhhhhhh    | ssssssssss | ssssssssshh-h | hhhhh      |            |  |
| DasR (S.c.)  | 89                 | VSQAL---QLTSYTEDMRAQGLEP-----TSQLLDIGYI-TADDRLAGLLDITAGGRVLRIERLRMANGEPMAIETTHLSAK-RFPALRRSLV--KYT    | 174                |            |            |               |            |            |  |
| PhnF (M.s.)  | 76                 | IRQPL---GMGSYTEAAKAQGLSA-----GRILVAWSDL-TADEVLAVGLVGVDPVQLQERVLTTDGVVVGLETTKLPAQ-RYPGLRETFD--HEA      | 161                |            |            |               |            |            |  |
| NagR (B.s.)  | 79                 | MEQAL---QGLTSFTEDMKSRGMTP-----GSRLIDYQLI-DSTEELAAIILGCGHPSSIHKITRVRRLANDIPMAIESSHIPFE-LAGELNESH---FQS | 164                |            |            |               |            |            |  |
| ScuR (S.c.)  | 83                 | VRRPL---ELSSLYDDLEAAGQRP-----ATKVLVNTVV-PATAEIAAALGVAEDSEVHRIERLRLTHGEPMAYLCNYLPPG-LVDLDT-GQL--EAT    | 167                |            |            |               |            |            |  |
| PsuR (P.s.)  | 89                 | SQSAL--FEVHNIADIAARGHRH-----TCKVMVLKEE-AAGSERALALDMREGQRVVFHSLIVHFENDIPVQIEDRFVNAQ-VAPDYLKQDF--TLQ    | 175                |            |            |               |            |            |  |
| CguR (C.g.)  | 92                 | VTRPV---ELTSFFNDLKNANLDP-----KTRVLEHRL-LAASSAIAEKLGVSADEVLLIRRLRSTGDI PVAILENYLPPA-FNDVSL-DEL--EKG    | 176                |            |            |               |            |            |  |
| BbuR (B.b.)  | 95                 | EARVR--YRFLRLAPDEEGEGGRA-----ESRILECRRL-RAPAEIARALELRAGETVVTIRRLQSMNHMPTVIDDLWLPGT-HFRGLTLELLTASKA    | 183                |            |            |               |            |            |  |
| EfuR (E.f.)  | 75                 | VQETM--TGTTSETEITLSQNRVP-----SSRTVSYFVA-KPSSSEMELQLGPEDSLRLMERIRFADDIPICFEVASIPYS-LVSQYKSE---ITN      | 160                |            |            |               |            |            |  |
| YurK (B.s.)  | 78                 | LKREL--IAVNGYSEFMESTGKKP-----KHHVLSHDI-I-PASKPIAEKLIQPEPVPVELKRIILYNDDQPLTFEVTHYPLD-LVPGIDTFIA--DGV   | 164                |            |            |               |            |            |  |
| PhnF (E.c.)  | 80                 | FDYPL--NAQAREFQNLDDQGSHP-----TSEKLLSVLR-PASGHVADALGITEGENVIHLRLTRRVNGVALCLIDHYFADLTWPTLQ--RF--DSG     | 165                |            |            |               |            |            |  |
| SauR (S.a.)  | 76                 | VPRRV---ARSGYRFDGATPFRQEQADGAVRGTWESHSEQAEASGAIAERLDIRPGERVMCTKYVFRDAGEVMMSTWEPLA-VTGRTPVMLP--EEG     | 169                |            |            |               |            |            |  |
| EcuR (E.c.)  | 83                 | VAYPL-GEGLLSFAESLESQKIHF-----TTEVITSRIE-PANRYVAEKLRIPTGQDILYLERLRSIGDEKAMLIENRINIE-LCPGIVEIDF--NQH    | 170                |            |            |               |            |            |  |
| TreR (B.s.)  | 74                 | MQFPV--SGLVSPKELAQTLGKET-----KTTVHKFGLE-PPSELIQQLRANLDDDIWEVIRSRKIDGHEVILDKDYFFRK-HVPHLTKEI---CEN     | 159                |            |            |               |            |            |  |
| StuR (St.a.) | 71                 | DANRINVKTNQFSKSLG--EHRM-----TSKVLVFKEMATPPKSVQDELQNLADDTVYYLERLRFVDDDLVLCIEYSYHKE-IVKYLNDI---AKG      | 157                |            |            |               |            |            |  |
| BcuR (B.c.)  | 77                 | QQEKA--RMIQTLTGTKAVYGSEV-----ESKIEFTIV-GADEIAEKLGISVGFVYKIRLRIIHSIPTIMEHTWMPIS-VIPGVEASV---LEE        | 162                |            |            |               |            |            |  |
| YydK (B.s.)  | 71                 | RKGYISLLSQGFKKDL--DFNV-----TSKVELDVR-KPTPEAAENLNIEMDEDIYYKRVRYINGQTLCEESYTKS-IVTYLNNEI---VSH          | 156                |            |            |               |            |            |  |
| BauR (B.a.)  | 77                 | QQEKA--RMIQTLTGTKAVYGSEV-----ESKIEFTIV-GADEIAEKLGISVGFVYKIRLRIIHSIPTIMEHTWMPIS-VIPGVEASV---LEE        | 162                |            |            |               |            |            |  |
| TraR (S.p.)  | 77                 | IVITG----ADRLDRMAKNGKRYAPGETSSGHRVMQRS---VYDPEVCAALDLEPGDEAVIRIRVFRQDDKPSVGVSVYPPH-TVAAVPELGQ---DER   | 165                |            |            |               |            |            |  |
|              |                    | $\alpha_5$                                                                                            | $\beta_4$          | $\alpha_6$ | $\beta_5$  | $\beta_6$     | $\beta_7$  |            |  |
|              |                    | h--hhhhh--h                                                                                           | ssssssssss         | hhhhhhh    | ssssssssss | ssssssssss    | ssssss     |            |  |
| DasR (S.c.)  | 175                | SI--YALAE--VYDVHLAEAEETIETSLATPREAGLLGTDVGL---PMLMSRHSYDR-TGQPVWVRSVYRG-DRYKFVARLKRQD----             | 254                |            |            |               |            |            |  |
| PhnF (M.s.)  | 162                | SI--YAEIRS---RGIATRTRVTDIDTALPDAREALLGADART---PMLLNRSYDQ-DDVAIEQRRSLYRG-DRMTFTAVMHAKNSAIVS            | 244                |            |            |               |            |            |  |
| NagR (B.s.)  | 165                | SI--YDHIER--YNSIPISRAKQLEPSAATTEEANILGIQKGA---PVLLIKRTTYLQ-NGTAFEHAKSVYRG-DRYTFVHYMDRLS-----          | 243                |            |            |               |            |            |  |
| ScuR (S.c.)  | 168                | GI--YRLMRA---AGITLHSARQSIGARAATSGEAERLGEDAGA---PLLTMERITTFDD-TGRAVEFGTHTYRP-SRYSFEFQLLVRP-----        | 245                |            |            |               |            |            |  |
| PsuR (P.s.)  | 176                | TP--YAYLSQ---VAPLTEGEHVVEAIIAEADECKLLQIDAGE---PCLLIRRTWS--GRQPVTAAARLIHPG-SRHRLEGRFTK-----            | 249                |            |            |               |            |            |  |
| CguR (C.g.)  | 177                | GI--YDALRS---RGVVLKIANQKIGARRAVGEESTLLDIEDGG---PLLTVERVALDN-SGQVIELGSHCYRP-DMYNFETTLVAR-----          | 253                |            |            |               |            |            |  |
| BbuR (B.b.)  | 184                | PI--YGLFES--EFGVSMVRADEKLRAVAASPEIAPLLGVEPGR---PLLVDRISYTY-GDRPMEVRRGLYLT-DHYHYRNSLN-----             | 259                |            |            |               |            |            |  |
| EfuR (E.f.)  | 161                | SF--YKTLA--KSGHKIGHSNQTI SAVQASEQIAEYLEIKRGD---AILRVQVSYFE-NGLPFEYVRTQYAG-SRFEFYLEK-----              | 235                |            |            |               |            |            |  |
| YurK (B.s.)  | 165                | SM--HDILKQ--QYKVVPTHNTKLLNVVYAQQEESKYLDLDCIDG---ALFEIDKTAFTS-NDQPIYCSLFLMHT-NRVFTTINSPYT-----         | 242                |            |            |               |            |            |  |
| PhnF (E.c.)  | 166                | SI--HDFLRE--QTGIALRRSQTRISARRAQAKECQRLEIPNMS---PLLCVRTLNRHDGESSPAEYSVSLTRA-DMIEFTMEH-----             | 241                |            |            |               |            |            |  |
| SauR (S.a.)  | 170                | PVGGMGVYERMAAIDVIVDNTVEVGARPLAEELLTLGGVPGH---VVLVIQRTYF-A-SGRPVETADVVPVPA-DRYRVAYHLPVK-----           | 250                |            |            |               |            |            |  |
| EcuR (E.c.)  | 171                | NI--FPTIES--LSKRKIRYSESRYAARLIGNERGHFLDISEDA---PVLHLEQLVFFS-REL PVEFGNVWLKG-NKYVLGTVLQRRELS---        | 251                |            |            |               |            |            |  |
| TreR (B.s.)  | 160                | SI--YEYIEG--ELGLSISYAQKEIVAEPCTDEDRELLDLRGYD---HMVVVRYNYVLE-DTSLFQYTESRHL-DKFRFVDFARRGK-----          | 238                |            |            |               |            |            |  |
| StuR (St.a.) | 158                | SI--FDYLES--NMKLRIGFSDIFFNVDKLTSSEASLLQLSTGE---PCLRVHQTFTYM-TGKPFDDSSDIVFHY-RHAQFYIPSKK-----          | 234                |            |            |               |            |            |  |
| BcuR (B.c.)  | 163                | SI--YSYIQN--KGLKVGTSVVRVKGIRPDDKEKQFMNLTNQD---FLMRVEQVAYLT-DGRTFEYSYADHLP-ETFEFETVITAKSYKEA-          | 245                |            |            |               |            |            |  |
| YydK (B.s.)  | 157                | SI--FHYIRE--GLGLKIGFSDLFLHVGQLNEEEAEYLGLEAGL---PKLYTESIFHLT-NGQPFYDYSKISYNY-EQSQFVVQANSFLL----        | 236                |            |            |               |            |            |  |
| BauR (B.a.)  | 163                | SI--YSHIQN--KGLQVGTSVVRVKGIRPDDKEKQFMNLTNQD---FLMRVEQVAYLT-DGRTFEYSYADHLP-ETFEFETVITAKSYKEA-          | 245                |            |            |               |            |            |  |
| TraR (S.p.)  | 166                | MVAQFDQLYT-ERTGREVVKGQRTAHARQASQDELAALDAPPASHAVMVTVTVTFHD-DERALGYWEDVYAPGARVPMGE-----                 | 245                |            |            |               |            |            |  |

Residues of DasR or NagR involved in the binding of potential effectors GlcN-6-P and GlcNAc-6-P  
Residues of GntR/HutC family members that might additionally/alternatively be involved in the phosphate moiety coordination of phosphorylated effectors

S4 Fig. Sequence alignment of structurally characterized members of the GntR/HutC transcription factor family (continued)
