# Supplementary material for: Crystal Structures of the Global Regulator DasR from Streptomyces coelicolor: Implications for the Allosteric Regulation of GntR/HutC Repressors
Source: PubMed Central journal article supplement (PMC4918961; doi:10.1371/journal.pone.0157691), 2016-06-23
Supplement: pone.0157691.s007.pdf [file pone.0157691.s007.pdf]

**S1 Table. Comparison of the effector-binding sites (pockets) from the crystal structures of ligand-free DasR-EBD, ligand-free DasR and effector-bound DasR-EBD. The pocket volumes were calculated as described in the ‘Materials and Methods’ section.**

| Structure                                      | ligand-free<br>DasR-EBD | ligand-free<br>DasR |              | DasR-EBD<br>+ GlcN-6-P |               | DasR-EBD<br>+ GlcNAc-6-P |               |
|------------------------------------------------|-------------------------|---------------------|--------------|------------------------|---------------|--------------------------|---------------|
|                                                | A (-)                   | A (-)               | B (-)        | A ( $\alpha$ )         | B ( $\beta$ ) | A ( $\alpha$ )           | B ( $\beta$ ) |
| chain-ID<br>(effector configuration)           | A (-)                   | A (-)               | B (-)        | A ( $\alpha$ )         | B ( $\beta$ ) | A ( $\alpha$ )           | B ( $\beta$ ) |
| MS volume <sup>a</sup> ( $\text{\AA}^3$ )      | 1029.5                  | 1126.8              | 1084.8       | 576.6                  | 668.3         | 577.9                    | 693.1         |
| SA volume <sup>b</sup> ( $\text{\AA}^3$ )      | <b>218.0</b>            | <b>252.0</b>        | <b>271.3</b> | <b>74.7</b>            | <b>94.1</b>   | <b>94.9</b>              | <b>101.8</b>  |
| pocket MS area <sup>c</sup> ( $\text{\AA}^2$ ) | 756.5                   | 874.8               | 804.0        | 577.6                  | 633.7         | 488.7                    | 643.0         |
| pocket SA area <sup>d</sup> ( $\text{\AA}^2$ ) | 426.8                   | 456.1               | 422.1        | 196.5                  | 238.0         | 217.8                    | 251.1         |
| # openings <sup>e</sup>                        | <b>2</b>                | <b>2</b>            | <b>2</b>     | <b>0</b>               | <b>1</b>      | <b>0</b>                 | <b>1</b>      |
| mouth MS area <sup>f</sup> ( $\text{\AA}^2$ )  | 146.9                   | 157.3               | 160.6        | -                      | 12.1          | -                        | 28.1          |
| mouth SA area <sup>g</sup> ( $\text{\AA}^2$ )  | 33.5                    | 51.0                | 58.4         | -                      | 0.3           | -                        | 4.6           |
| MS circumference <sup>h</sup> ( $\text{\AA}$ ) | 89.8                    | 86.0                | 83.9         | -                      | 12.7          | -                        | 22.1          |
| SA circumference <sup>i</sup> ( $\text{\AA}$ ) | 73.1                    | 67.0                | 65.5         | -                      | 4.7           | -                        | 13.7          |

pocket volume based on the <sup>a</sup> molecular surface / <sup>b</sup> solvent-accessible surface  
<sup>c</sup> pocket molecular surface area / <sup>d</sup> pocket solvent-accessible surface area  
<sup>e</sup> number of mouths or openings to the external molecular surface  
total area of mouth opening(s) based on the <sup>f</sup> molecular surface / <sup>g</sup> solvent-accessible surface  
total circumference of mouth opening(s) based on the <sup>h</sup> molecular surface / <sup>i</sup> solvent-accessible surface
