# Supplementary material for: Crystal Structures of the Global Regulator DasR from Streptomyces coelicolor: Implications for the Allosteric Regulation of GntR/HutC Repressors
Source: PubMed Central journal article supplement (PMC4918961; doi:10.1371/journal.pone.0157691), 2016-06-23
Supplement: pone.0157691.s008.pdf [file pone.0157691.s008.pdf]

**S2 Table. Structurally characterized members of the GntR/HutC transcription factor family.** The listed regulators were identified by a protein structure database search (Dali Lite v.3, [60]) *via* the Dali server using the crystal structure of full-length DasR (PDB-ID 4ZS8) as a search model. From the resulting structures only those containing a GntR-family-specific wHTH domain as well as a HutC-subfamily-specific UTRA domain (as described in the respective entry in the UniProt database [19]) were used for a subsequent multiple sequence alignment *via* CLUSTAL OMEGA [59] that is shown in S4 Fig. For a better discrimination, regulators without an individual gene or protein name and mostly of unknown function were given unambiguous acronyms, e.g. ScuR for *S. coelicolor* unnamed Regulator. The panel “Match of characteristic residues” describes residues that are explicitly involved in DNA binding of NagR [11] and in effector binding of DasR and/or NagR (Fig 9), and their equivalents from other GntR/HutC family members inferred by structural comparison with DasR and NagR. Residues marked in red were only inferred by sequence due to the lack of structural information.

| Name | Organism                       | Gene           | Uniprot ID<br>PDB-ID | Function                                                | Residues in<br>structure<br>(total) | Sequence<br>identity to<br>DasR (%) | Match of characteristic residues |                               | Additional information                             |
|------|--------------------------------|----------------|----------------------|---------------------------------------------------------|-------------------------------------|-------------------------------------|----------------------------------|-------------------------------|----------------------------------------------------|
|      |                                |                |                      |                                                         |                                     |                                     | DBD                              | EBD                           |                                                    |
| DasR | <i>Streptomyces coelicolor</i> | <i>dasR</i>    | Q9K492<br>4ZS8       | global regulator;<br>part of nutrient<br>sensing system | 22-251<br>(254)                     | 100                                 | R48 R58 G79                      | R142 R144 E154 Y177 R221 Y238 |                                                    |
| PhnF | <i>Mycobacterium smegmatis</i> | <i>phnF</i>    | A0QQ72<br>3F8M       | transcr. regulator<br>of unknown function               | 2-244<br>(244)                      | 39.6                                | R36 R46 G66                      | R129 L131 E141 Y164 R207 Y224 | S84 & R89 for phosphate<br>moiety interaction [18] |
| NagR | <i>Bacillus subtilis</i>       | <i>yvoA</i>    | O34817<br>4U0V       | local regulator;<br>part of nutrient<br>sensing system  | 1-243<br>(243)                      | 38.8                                | R38 R48 G69                      | R133 R135 E145 Y167 R211 Y228 |                                                    |
| ScuR | <i>Streptomyces coelicolor</i> | <i>SCO6256</i> | Q9RKT6<br>2RA5       | transcr. regulator<br>of unknown function               | 1-245<br>(245)                      | 34.6                                | I42 R52 G73                      | R136 R138 L148 Y170 R213 Y230 | S,R meso-tartaric acid in<br>binding pocket        |
| PsuR | <i>Pseudomonas syringae</i>    | <i>hutC</i>    | Q87UX0<br>2PKH       | repressor of<br>histidine utilization                   | 105-249<br>(249)                    | 30.5                                | S48 R58 G79                      | I143 H145 E155 Y178 R220 H236 | R156 for phosphate moiety<br>interaction?          |

|      |                                      |         |                |                                           |                  |      |             |                               |                                                                              |
|------|--------------------------------------|---------|----------------|-------------------------------------------|------------------|------|-------------|-------------------------------|------------------------------------------------------------------------------|
| CguR | <i>Corynebacterium glutamicum</i>    | cg0196  | Q8NTZ4<br>2P19 | transcr. regulator<br>of unknown function | 105-253<br>(253) | 30.4 | I51 R61 G82 | R145 R147 L157 Y177 R222 Y239 |                                                                              |
| BbuR | <i>Bacillus bronchiseptica</i>       | BB3683  | Q7WD95<br>3CNV | transcr. regulator<br>of unknown function | 98-259<br>(259)  | 29.8 | I54 Q64 G85 | R149 L151 D161 Y186 R230 Y247 | R99 & R243 for phosphate moiety interaction? Citrate anion in binding pocket |
| EfuR | <i>Enterococcus faecalis</i>         | EF1328  | Q835P8<br>3DDV | transcr. regulator<br>of unknown function | 91-235<br>(235)  | 28.9 | R34 R44 G65 | R128 R130 E141 F163 Q207 L224 |                                                                              |
| YurK | <i>Bacillus subtilis</i>             | yurK    | O32152<br>2IKK | transcr. regulator<br>of unknown function | 94-242<br>(242)  | 26.4 | N37 R47 G68 | R132 L134 E144 H167 K211 M228 | Sulphate anion in binding pocket                                             |
| PhnF | <i>Escherichia coli</i>              | phnF    | K16684<br>2FA1 | transcr. regulator<br>of unknown function | 85-241<br>(241)  | 25.3 | Q39 R49 G70 | T134 R136 I146 H168 R212 T230 | R133 for phosphate moiety interaction?                                       |
| SauR | <i>Streptomyces avermitilis</i>      | SAV3189 | Q82IF8<br>3EET | transcr. regulator<br>of unknown function | 1-250<br>(250)   | 22.9 | A35 D45 G66 | Y137 F139 S149 V177 R220 V236 | R36 for DNA interaction?<br>R86 & R95 for phosphate moiety interaction?      |
| EcuR | <i>Escherichia coli</i>              | c4276   | Q8FCM7<br>3HFI | transcr. regulator<br>of unknown function | 82-251<br>(251)  | 22.8 | Y42 R52 G73 | R138 R140 I150 F173 Q217 L234 | No dimerization of EBD                                                       |
| TreR | <i>Bacillus subtilis</i>             | treR    | P39796<br>2OGG | repressor of<br>trehalose operon          | 90-238<br>(238)  | 21.8 | H32 R42 G63 | R128 R130 D140 Y162 N206 H223 | Sulphate anion in binding pocket                                             |
| StuR | <i>Staphylococcus aureus</i>         | SA0254  | Q7A7U1<br>2OOI | transcr. regulator<br>of unknown function | 73-234<br>(234)  | 21.1 | T30 K40 G61 | R126 R128 E138 F160 Q204 F221 | Two ethylene glycol molecules in area of binding pocket                      |
| YydK | <i>Bacillus subtilis</i>             | yydK    | Q45591<br>3BWG | transcr. regulator<br>of unknown function | 1-236<br>(236)   | 20.4 | E30 K40 G61 | R125 R127 E137 F159 S203 Y220 |                                                                              |
| BauR | <i>Bacillus anthracis</i>            | BA3458  | Q81MW2<br>3LHE | transcr. regulator<br>of unknown function | 93-232<br>(245)  | 19.3 | P36 V46 G67 | R131 R133 E143 Y165 Q209 H226 | High identity (>97%) to BcuR ( <i>B. cereus</i> )<br>No dimerization of EBD  |
| BcuR | <i>Bacillus cereus</i>               | BC3424  | Q735I1<br>3L5Z | transcr. regulator<br>of unknown function | 92-245<br>(245)  | 18.8 | P36 V46 G67 | R131 R133 E143 Y165 Q209 H226 | High identity (>97%) to BauR ( <i>B. anthracis</i> )                         |
| TraR | <i>Streptomyces phaeochromogenes</i> | traR    | Q54677<br>1V4R | transcr. regulator<br>of unknown function | 7-99<br>(245)    | 16.6 | T36 A46 A66 | R133 R136 G145 Y174 T218 Y235 | NMR structure                                                                |
