# Supplementary material for: Crystal Structures of the Global Regulator DasR from Streptomyces coelicolor: Implications for the Allosteric Regulation of GntR/HutC Repressors
Source: PubMed Central journal article supplement (PMC4918961; doi:10.1371/journal.pone.0157691), 2016-06-23
Supplement: pone.0157691.s009.pdf [file pone.0157691.s009.pdf]

**S3 Table. Pairwise comparison of protein sequence identities between all GntR/HutC transcription factors used in the multiple sequence alignment shown in S4 Fig.** The sequence identities were calculated with CLUSTAL OMEGA [59].

| Name        | Protein sequence identity (%) |      |      |      |      |      |      |      |      |      |      |      |      |      |      |      |      |      |  |
|-------------|-------------------------------|------|------|------|------|------|------|------|------|------|------|------|------|------|------|------|------|------|--|
|             | DasR                          | PhnF | NagR | ScuR | PsuR | CguR | BbuR | EfuR | YurK | PhnF | SauR | EcuR | TreR | StuR | YydK | BauR | BcuR | TraR |  |
| <b>DasR</b> | 100                           |      |      |      |      |      |      |      |      |      |      |      |      |      |      |      |      |      |  |
| <b>PhnF</b> | 39.6                          | 100  |      |      |      |      |      |      |      |      |      |      |      |      |      |      |      |      |  |
| <b>NagR</b> | 38.8                          | 31.1 | 100  |      |      |      |      |      |      |      |      |      |      |      |      |      |      |      |  |
| <b>ScuR</b> | 34.6                          | 24.4 | 34.6 | 100  |      |      |      |      |      |      |      |      |      |      |      |      |      |      |  |
| <b>PsuR</b> | 30.5                          | 21.7 | 27.7 | 26.6 | 100  |      |      |      |      |      |      |      |      |      |      |      |      |      |  |
| <b>CguR</b> | 30.4                          | 24.5 | 28.9 | 50.0 | 24.7 | 100  |      |      |      |      |      |      |      |      |      |      |      |      |  |
| <b>BbuR</b> | 29.8                          | 23.4 | 26.5 | 30.4 | 23.5 | 31.7 | 100  |      |      |      |      |      |      |      |      |      |      |      |  |
| <b>EfuR</b> | 28.9                          | 24.1 | 34.0 | 26.3 | 22.4 | 28.9 | 23.0 | 100  |      |      |      |      |      |      |      |      |      |      |  |
| <b>YurK</b> | 26.4                          | 20.5 | 26.1 | 24.7 | 23.5 | 27.2 | 24.3 | 29.4 | 100  |      |      |      |      |      |      |      |      |      |  |
| <b>PhnF</b> | 25.3                          | 25.4 | 20.3 | 27.9 | 19.1 | 27.9 | 23.0 | 23.3 | 23.3 | 100  |      |      |      |      |      |      |      |      |  |
| <b>SauR</b> | 22.9                          | 16.0 | 21.1 | 22.9 | 22.7 | 24.2 | 22.5 | 15.9 | 20.6 | 17.2 | 100  |      |      |      |      |      |      |      |  |
| <b>EcuR</b> | 22.8                          | 19.1 | 25.9 | 25.3 | 21.8 | 27.5 | 22.1 | 26.0 | 25.2 | 25.1 | 19.3 | 100  |      |      |      |      |      |      |  |
| <b>TreR</b> | 21.8                          | 21.1 | 24.5 | 21.8 | 17.2 | 19.3 | 18.8 | 25.3 | 19.9 | 20.0 | 14.5 | 21.5 | 100  |      |      |      |      |      |  |
| <b>StuR</b> | 21.1                          | 15.0 | 21.7 | 20.6 | 19.7 | 19.7 | 20.9 | 24.0 | 22.9 | 22.1 | 18.3 | 19.4 | 21.2 | 100  |      |      |      |      |  |
| <b>YydK</b> | 20.4                          | 16.6 | 26.6 | 23.0 | 16.2 | 18.8 | 19.6 | 25.3 | 21.6 | 23.0 | 15.7 | 22.6 | 25.3 | 39.9 | 100  |      |      |      |  |
| <b>BauR</b> | 19.3                          | 22.4 | 22.8 | 20.6 | 17.4 | 22.4 | 22.3 | 25.5 | 20.4 | 21.8 | 17.3 | 18.9 | 24.9 | 21.7 | 24.8 | 100  |      |      |  |
| <b>BcuR</b> | 18.8                          | 22.4 | 22.8 | 21.0 | 18.2 | 22.8 | 22.3 | 25.1 | 20.4 | 21.8 | 17.7 | 19.3 | 25.7 | 22.1 | 25.2 | 97.6 | 100  |      |  |
| <b>TraR</b> | 16.6                          | 20.5 | 21.3 | 21.4 | 20.2 | 19.7 | 19.5 | 21.5 | 18.2 | 18.4 | 20.9 | 17.8 | 15.9 | 16.7 | 16.2 | 19.1 | 18.7 | 100  |  |
